# Supplementary material for: Candidate Genetic Modifiers for RPGR Retinal Degeneration
Source: PubMed Central journal article supplement — Invest Ophthalmol Vis Sci. 2020 Dec 16;61(14):20. doi: 10.1167/iovs.61.14.20 (PMC7745631; doi:10.1167/iovs.61.14.20), 2020-12-16
Supplement: iovs-61-14-20_s001.pdf [file iovs-61-14-20_s001.pdf]

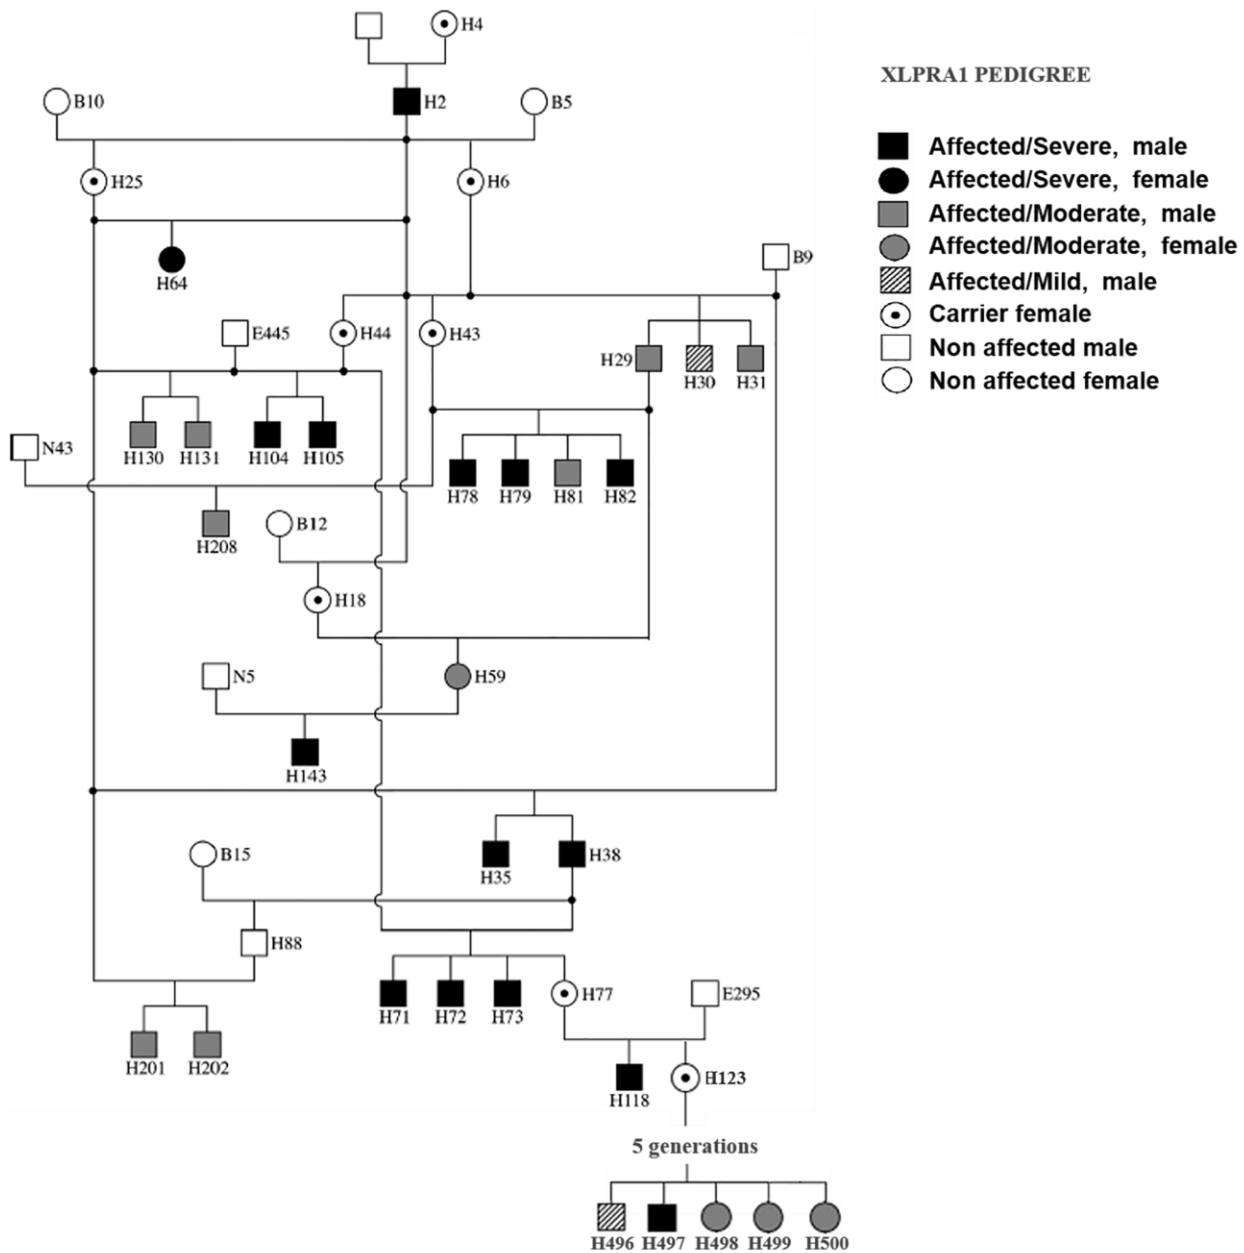

**Supplementary Figure S1. XLPR1 study pedigree.** Note: the Figure is modified from Appelbaum et al.<sup>20</sup>.
