# Supplementary material for: Candidate Genetic Modifiers for RPGR Retinal Degeneration
Source: PubMed Central journal article supplement — Invest Ophthalmol Vis Sci. 2020 Dec 16;61(14):20. doi: 10.1167/iovs.61.14.20 (PMC7745631; doi:10.1167/iovs.61.14.20), 2020-12-16
Supplement: iovs-61-14-20_s003.pdf [file iovs-61-14-20_s003.pdf]

**Supplementary Table S1.** List of primers used in the study.

| <b>Transcript</b>            | <b>Accession number</b>      | <b>Splice variant</b>                                                       | <b>Analysis</b>              | <b>Primer sequences* (5'→3')</b>                                                       |
|------------------------------|------------------------------|-----------------------------------------------------------------------------|------------------------------|----------------------------------------------------------------------------------------|
| <u>DOG</u>                   |                              |                                                                             |                              |                                                                                        |
| <i>ROBO1</i>                 | MK450411                     |                                                                             | real-time PCR<br>[exons 1-2] | <b>F:</b> CACTCCTCAGCTTGTCCAAAGATCACC<br><b>R:</b> GCCCAGCGAATTGTCATCATTATCA           |
|                              |                              |                                                                             | 5'RACE                       | <b>outer:</b> GGCTCACAGCCTCTCCGAGGTAA<br><b>inner:</b> GAGTTGCAGGTTCTCCTTTTGACACA      |
|                              |                              |                                                                             | RT-PCR/RPA<br>[exons 10-11]  | <b>F:</b> CATTGACAAGGTCCTGTGAATCAGAC<br><b>R:</b> TTGATGCAATGCAGGTGTACCGAC             |
|                              |                              |                                                                             | ssRNA control,<br>RT-PCR/RPA | <b>F:</b> CCAGTGCCCTCGACCCACAA<br><b>R:</b> TGGCACCATAACAGGTCTCGACC                    |
| <i>ROBO1-AS</i>              | MK450414                     | v.1                                                                         | 5'RACE                       | <b>outer:</b> ACAGGTCGGTACACCTGCATTGCA<br><b>inner:</b> GCATCAACCCCCAGTGGTGAAGCA       |
|                              | MK450415                     | v.2                                                                         | 3'RACE                       | <b>outer:</b> AGATGCATGGCTGAAGGCTTC<br><b>inner:</b> AATATAAGATGTTGGAGTTGCACCTGAATTCAA |
|                              | MK450416                     | v.3                                                                         |                              |                                                                                        |
| <i>ROBO2</i>                 | MK450412                     | v.1                                                                         | real-time PCR<br>[exons 1-2] | <b>F:</b> GTCGGCTGATGTTTACACA ACTACTGCTC<br><b>R:</b> CGGCCCTCTGCCTTACAGTTCAA          |
|                              |                              |                                                                             | MK450413                     | v.2                                                                                    |
|                              | RT-PCR/RPA<br>[exon 2]       | <b>F:</b> TCTGAGCAAGCTGACTCGGACCC<br><b>R:</b> TCCTTGTGAGTCTCCACCCGCTC      |                              |                                                                                        |
|                              | real-time PCR<br>[exons 1-2] | <b>F:</b> AACTCTGAGCAAGCTGACTCGGACC<br><b>R:</b> CAATGACATCTGAAGGGTGTCTCCAC |                              |                                                                                        |
|                              | <i>ROBO2-AS</i>              | MK450417<br>MK450418<br>MK450419                                            | v.1<br>v.2<br>v.3            | 5'RACE                                                                                 |
| 3'RACE                       |                              |                                                                             |                              | <b>outer:</b> TAAGTGCATTTCTGAAAATGGTGA<br><b>inner:</b> CCAGAGATGCATTTGACTTACTGCTTCA   |
| real-time PCR<br>[exons 1-2] |                              |                                                                             |                              | <b>F:</b> TCAACAGGGTAAACTGGCAACAAACAA<br><b>R:</b> TGCGAGGAACTATCTCGGTGAAGCA           |
| <i>RBM11</i>                 | MN989983                     | v.1<br>v.2 / v.3                                                            | full-length                  | <b>F:</b> CATTCTGAAAATGGTGATTTGCC<br><b>R:</b> GGACCAACTCTGAGCAAGCTGA                  |
|                              |                              |                                                                             | RT-PCR<br>[exons 1-3]        | <b>F:</b> CATTCTGAAAATGGTGATTTGCC<br><b>R:</b> GAAAATGTAGCTCCAGCAGGCA                  |
|                              |                              |                                                                             | RT-PCR<br>[exons 3-4]        | <b>F:</b> TGCCTGCTGGAGCTACATTTTC<br><b>R:</b> GGACCAACTCTGAGCAAGCTGA                   |
|                              |                              |                                                                             | RT-PCR<br>[exons 2-3]        | <b>F:</b> GGAGGGAAGTCTTCTTGCGA<br><b>R:</b> GAAAATGTAGCTCCAGCAGGCA                     |
|                              |                              |                                                                             | full-length ORF              | <b>F:</b> CCTCCATCCTTGGCGGAGACCGGA<br><b>R:</b> GAAGACCTGGGCAGACAAATTTCACTTGAACA       |

|                 |                        |     |                                    |                                                                                                                                                   |
|-----------------|------------------------|-----|------------------------------------|---------------------------------------------------------------------------------------------------------------------------------------------------|
|                 |                        |     | real-time PCR<br>[exons 3-5]       | <b>F:</b> CTCGCTCTTCTGAACCAGCTAACCAA<br><b>R:</b> GCTGGAGGGCTGGATTATACGCA                                                                         |
| <i>NR1P1</i>    | ENSCAFT0<br>0000012894 |     | real-time PCR                      | <b>F:</b> ATGACTCATGGAGAAGAGCTTGGCTC<br><b>R:</b> GGCCGGAAATGCATTACCAGAAA                                                                         |
| <i>HSPA13</i>   | MN989982               |     | full-length ORF                    | <b>F:</b> GCTTCTCGAACAGCGTTGGAGCAAGAGA<br><b>R:</b> TGGAGGTGGTCTGATAAAGAGGAAGAGGCTCATC                                                            |
|                 |                        |     | real-time PCR<br>[exons 3-4]       | <b>F:</b> GAGGAATATCTTGGAAATGCCAGTTGC<br><b>R:</b> GACCTCAGCCTTGTGGAGGCC                                                                          |
| <i>SAMSN1</i>   | MN989984               | v.1 | full-length ORF                    | <b>F:</b> ACAGAAAGTGCACCTTGCTTGGAGCAGTCTGA<br><b>R:</b> TGCCAAAGACTTACACTGTACCTTTTTCTAATACAGGCAA                                                  |
|                 |                        |     | real-time PCR<br>[exons 1-2]       | <b>F:</b> GTGCACTTGCTTGGAGCAGTCTGA<br><b>R:</b> CTGGTTTTGAAATGGAACTATTCCGAA<br>[T in this position was replaced on <u>C</u> to assist PCR]        |
|                 | MN989985               | v.2 | full-length ORF                    | <b>F:</b> GCGACAAGGGACTGAAGCCACCTCAA<br><b>R:</b> TGCCAAAGACTTACACTGTACCTTTTTCTAATACAGGCAA                                                        |
|                 |                        |     | real-time PCR<br>[exons 2-5]       | <b>F:</b> GCCAGTCCCAGAGCAACAACTAACC<br><b>R:</b> <u>C</u> GTTCTCGCCAGATTGTGTCATTCA<br>[G in this position was replaced on <u>C</u> to assist PCR] |
| <i>USP25</i>    | MN989981               |     | full-length ORF                    | <b>F:</b> ATGACCGTGGAGCAGAACGTGCTGCAG<br><b>R:</b> GCAAACCCTGTGACAGGAAGGCAAGGGTTAA                                                                |
|                 |                        |     | real-time PCR<br>[exons 2-3]       | <b>F:</b> AGCACCAGCAGACGTTTTTGAATCA<br><b>R:</b> GGCATTCTTTCAGTAAGGAAAGCC                                                                         |
|                 |                        |     | genomic DNA<br>control,<br>PCR/RPA | <b>F:</b> TGAACAGAGGTCACAGTACTATGCCAGAA<br><b>R:</b> CATTAGCTGTTTGCATCATGACACCATTA                                                                |
| <u>MOUSE</u>    |                        |     |                                    |                                                                                                                                                   |
| <i>Robo2-AS</i> | MK753303               | v.1 | full-length                        | <b>F:</b> CCTGTACTAAATTTCTACTTATTTTGCAAGAGTGCTCA<br><b>R:</b> TCGTTTTGATGTTATTCTTCTCAGGACCAACTCTA                                                 |
|                 |                        |     | 5'RACE                             | <b>outer:</b><br>TGTGATACTTTCATATTCTTAAAAAATATGTGGTGGTA<br><b>inner:</b> AAAATATGTGGTGGTAGTTTACTATCTTGGTGCCAAT                                    |
