# Supplementary material for: Candidate Genetic Modifiers for RPGR Retinal Degeneration
Source: PubMed Central journal article supplement — Invest Ophthalmol Vis Sci. 2020 Dec 16;61(14):20. doi: 10.1167/iovs.61.14.20 (PMC7745631; doi:10.1167/iovs.61.14.20), 2020-12-16
Supplement: iovs-61-14-20_s004.pdf [file iovs-61-14-20_s004.pdf]

**Supplementary Table S2.** Characterization the mapped genes within the genomic region on CFA31.

| <b>Transcript</b> | <b>Accession number / transcript variant</b> | <b>Position on CFA31</b> |          | <b>DNA strand</b> | <b>Protein function or pathway</b>              |
|-------------------|----------------------------------------------|--------------------------|----------|-------------------|-------------------------------------------------|
| <i>ROBO1</i>      | MK450411                                     | 7626080                  | 8593227  | +                 | Axon repulsion, neurogenesis                    |
| <i>ROBO1-AS</i>   | MK450414 / v.1                               | 8512184                  | 8525182  | -                 |                                                 |
|                   | MK450415 / v.2                               | 8480852                  | 8525182  | -                 |                                                 |
|                   | MK450416 / v.3                               | 8453564                  | 8525182  | -                 |                                                 |
| <i>ROBO2</i>      | MK450412 / v.1                               | 9418695                  | 10000188 | -                 | Axon repulsion, neurogenesis                    |
|                   | MK450413 / v.2                               | 9418695                  | 10676251 | -                 |                                                 |
| <i>ROBO2-AS</i>   | MK450417 / v.1                               | 9715724                  | 10676129 | +                 |                                                 |
|                   | MK450418 / v.2                               | 9715724                  | 10676129 | +                 |                                                 |
|                   | MK450419 / v.3                               | 9715724                  | 10676129 | +                 |                                                 |
| <i>RBM11</i>      | MN989983                                     | 11204346                 | 11217500 | +                 | Tissue-specific splicing factor                 |
| <i>HSPA13</i>     | MN989982                                     | 11367799                 | 11377872 | -                 | Processing of cytosolic and secretory proteins  |
| <i>SAMSN1</i>     | MN989984 / v.1                               | 11486386                 | 11533983 | -                 | Putative adaptor and scaffold protein           |
|                   | MN989985 / v.2                               | 11486386                 | 11623940 | -                 |                                                 |
| <i>NRIP1</i>      | ENSCAFT00000012894                           | 11855900                 | 11859397 | -                 | Putative transcriptional repressor or activator |
| <i>USP25</i>      | MN989981                                     | 12555707                 | 12691588 | +                 | Deubiquitinating enzyme                         |
